# Supplementary material for: Targeted Delivery of Immunomodulators to Lymph Nodes
Source: PubMed Central journal article supplement — Cell Rep. Author manuscript; Available in PMC 2017 May 10. (PMC4973867; doi:10.1016/j.celrep.2016.04.007), 2016-04-28
Supplement: NIHMS805043-supplement-Supplemental.pdf [file NIHMS805043-supplement-Supplemental.pdf]

| Group               | MP-Rhd-MECA79                                | MP-Rhd                             |
|---------------------|----------------------------------------------|------------------------------------|
|                     | Rhd-PLA/PEG-PLGA/PLA-PEG-protein G/MECA79 Ab | Rhd-PLA/PEG-PLGA/PLA-PEG-protein G |
| $M_w$ PEG (Da)      | 5k                                           | 5k                                 |
| Size ( $\mu$ m)     | 1.62                                         | 1.63                               |
| PDI                 | 0.43                                         | 0.43                               |
| Zeta potencial (mV) | -22                                          | -21                                |

Supplementary Table 1

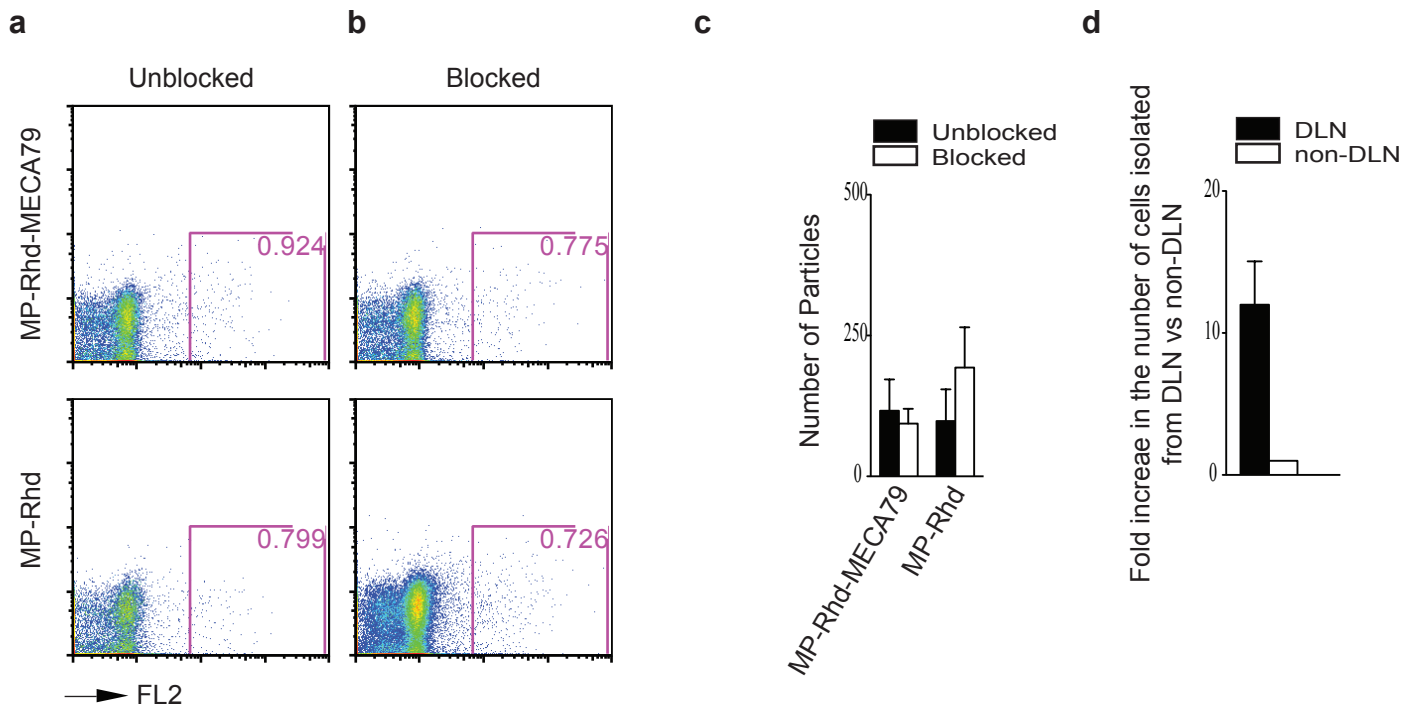

Azzi et al. Supplementary Figure 1

**a**

Spleen

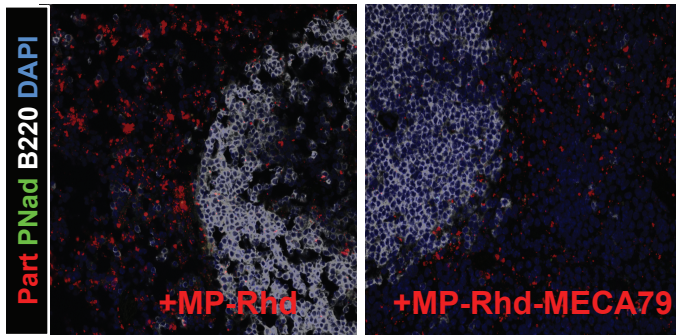

**b**

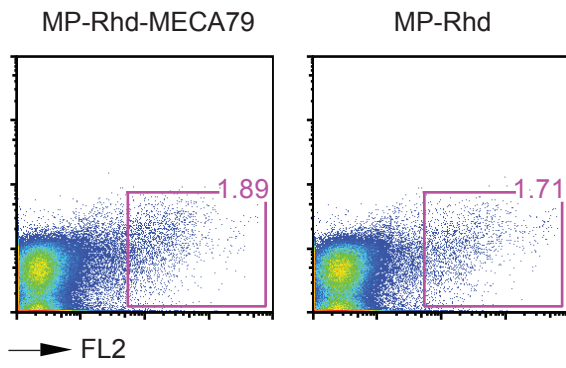

**c**

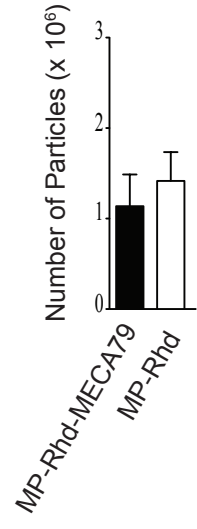

Azzi et al. Supplementary Figure 2

## Supplemental materials

**Table S1.** This table supports Fig. 1. Formulation parameter and physicochemical properties of PEGylated, rhodamine (Rhd) labeled MP-TAC-MECA79 and MP-TAC ( $M_w$  PEG: molecular weight of poly(ethylene glycol)).

Referenced in page 7

**Fig. S1.** This figure supports Fig. 4 and 5. Blocking PNAd does not affect trafficking of MP-MECA79 or MP particles to non-draining LN in a transplant mice model.

(A) FACS analysis of cell suspension from the pancreatic non-draining LNs of skin transplant recipients injected with either MP-Rhd-MECA79 or MP-Rhd showing no difference in accumulation of rhodamine labeled MP-MECA79 compared to MP. (B) FACS analysis of cell suspension from the pancreatic non-draining LNs of skin transplant recipients injected with blocking anti PNAd antibody 1 hour before injection of rhodamine labeled particles. (C) Graph in panel C shows the absolute number of rhodamine labeled particles (n=4 mice /group, p =ns). (D) Graph shows the fold increase in the number of cells isolated from the DLN of transplanted mice compared to non draining LN (n=3/group).

Referenced in pages 8, 9 and 10

**Fig. S2.** This figure supports figure 4. Trafficking of MP-MECA79 and MP particles to the spleen (A) Spleens of mice transplanted with allogeneic skin-grafts were analyzed by immunohistochemistry after intravenous injection of rhodamine labeled MP-TAC-MECA79 (MP-Rhd-MECA79) or MP-TAC (MP-Rhd). No PNAd staining was detected. Many MECA79 particles are seen in addition to B220 staining (white) and the cell nuclei (DAPI). 40X objective



was used. (n=4 mice/group). (B) FACS analysis of cell suspension from the spleens of skin transplant recipients injected with MP-Rhd-MECA79 or MP-Rhd. (C) Graph in panel C shows the absolute number of rhodamine labeled particles in the spleens of the treated mice (n=4 mice /group, \* p < 0.05).

Referenced in pages 8, 9 and 10

**Video S1.** This video support figure 4. Optical sections of the tissue imaged by the two-photon microscopy were compiled into a three-dimensional volume

Referenced in page 8
